# Supplementary material for: A shared neural basis underlying psychiatric comorbidity
Source: Springer Nature journal article supplement (doi:10.1038/s41591-023-02317-4), 2023-04-24
Supplement: MOESM1 [file 41591_2023_2317_MOESM1_ESM.pdf]

---

# A shared neural basis underlying psychiatric comorbidity

---

In the format provided by the  
authors and unedited

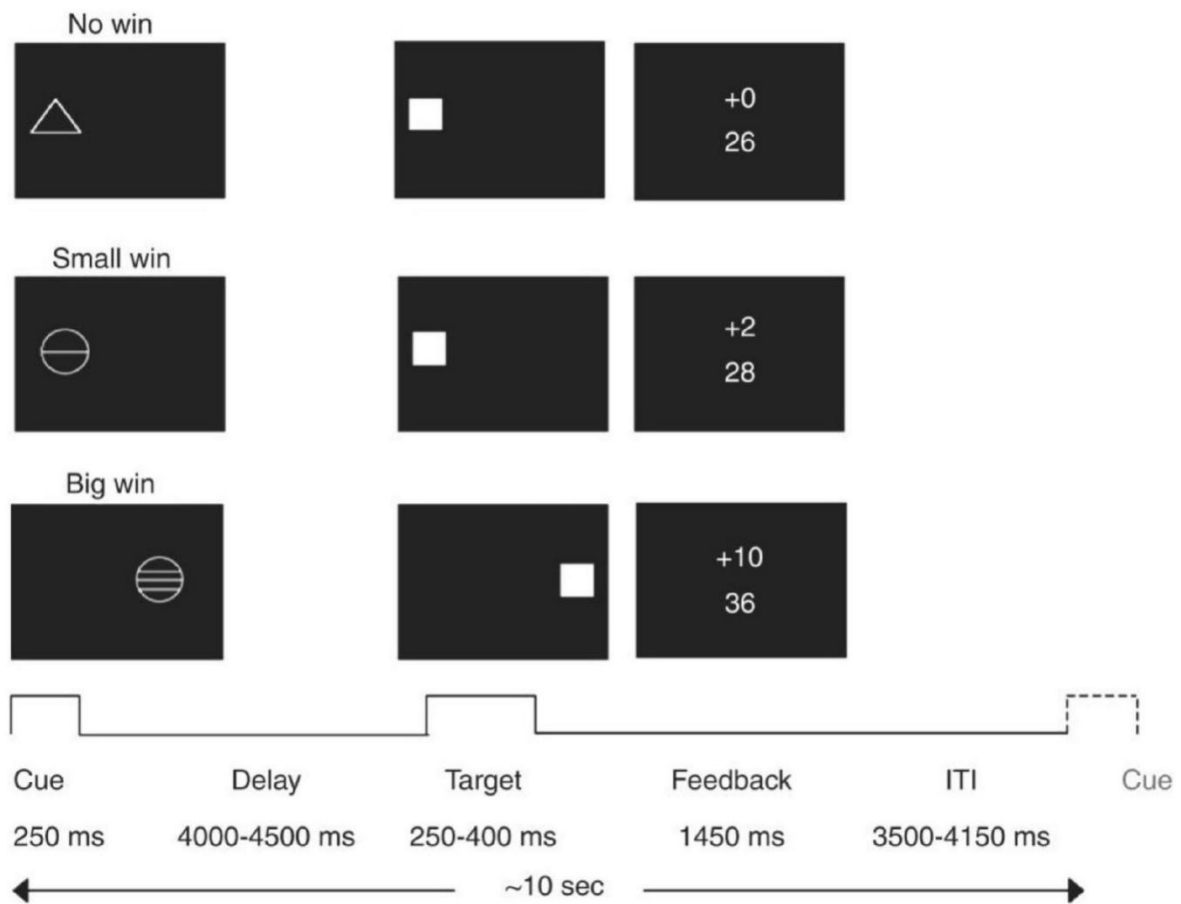

**Figure S1. The task design of the Monetary Incentive Delay (MID) Task.**

The figure of experimental paradigm was adapted from a previous publication (Jia, T., et al. Neurobehavioural characterisation and stratification of reinforcement-related behaviour. *Nat Hum Behav* 4, 544-558 (2020).).

Number of Go trials/ Stop trials:  
480/80

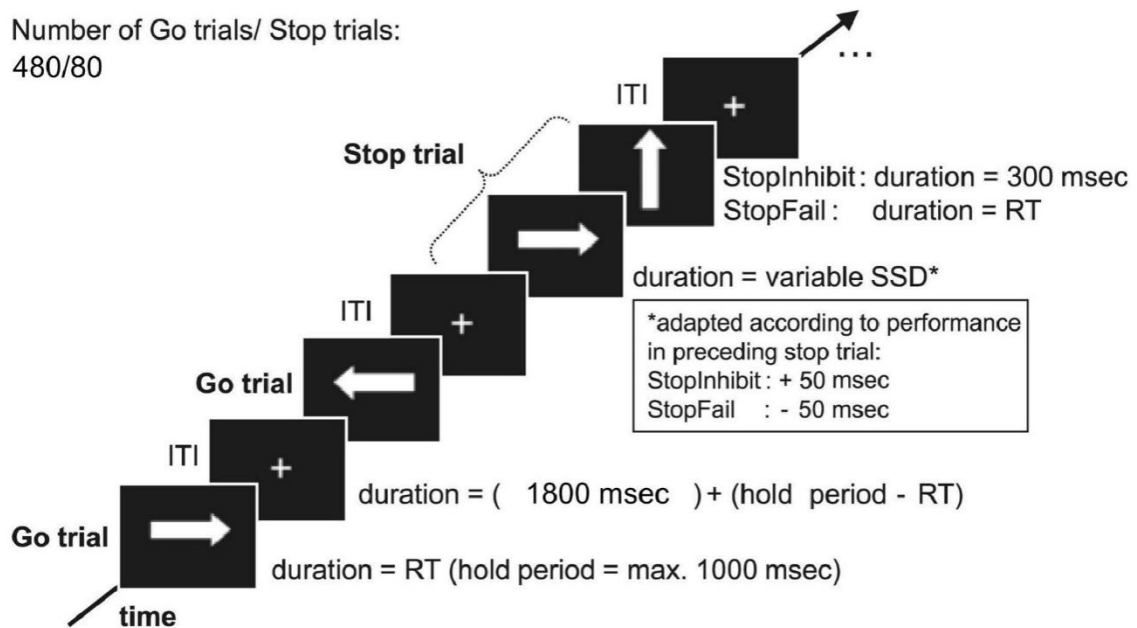

**Figure S2. The task design of the stop signal Task (SST).**

The figure of experimental paradigm was adapted from a previous publication (Jia, T., et al. Neurobehavioural characterisation and stratification of reinforcement-related behaviour. Nat Hum Behav 4, 544-558 (2020)).

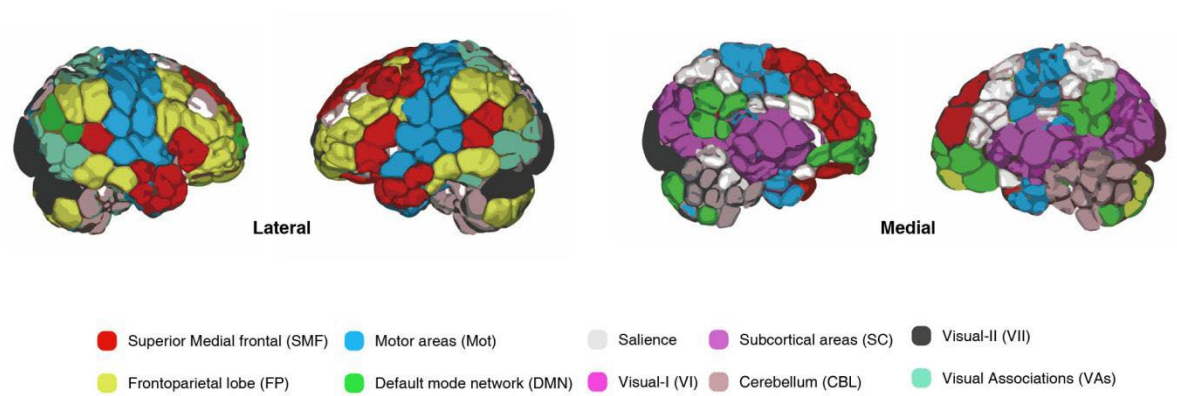

**Figure S3. Ten large-scale canonical networks for anatomical interpretation.**

The figure of shen-268 template was adapted from a previous publication (Greene, A.S., Gao, S., Scheinost, D. & Constable, R.T. Task-induced brain state manipulation improves prediction of individual traits. *Nature communications* 9, 2807 (2018)).

# Connective predictive model (CPM)

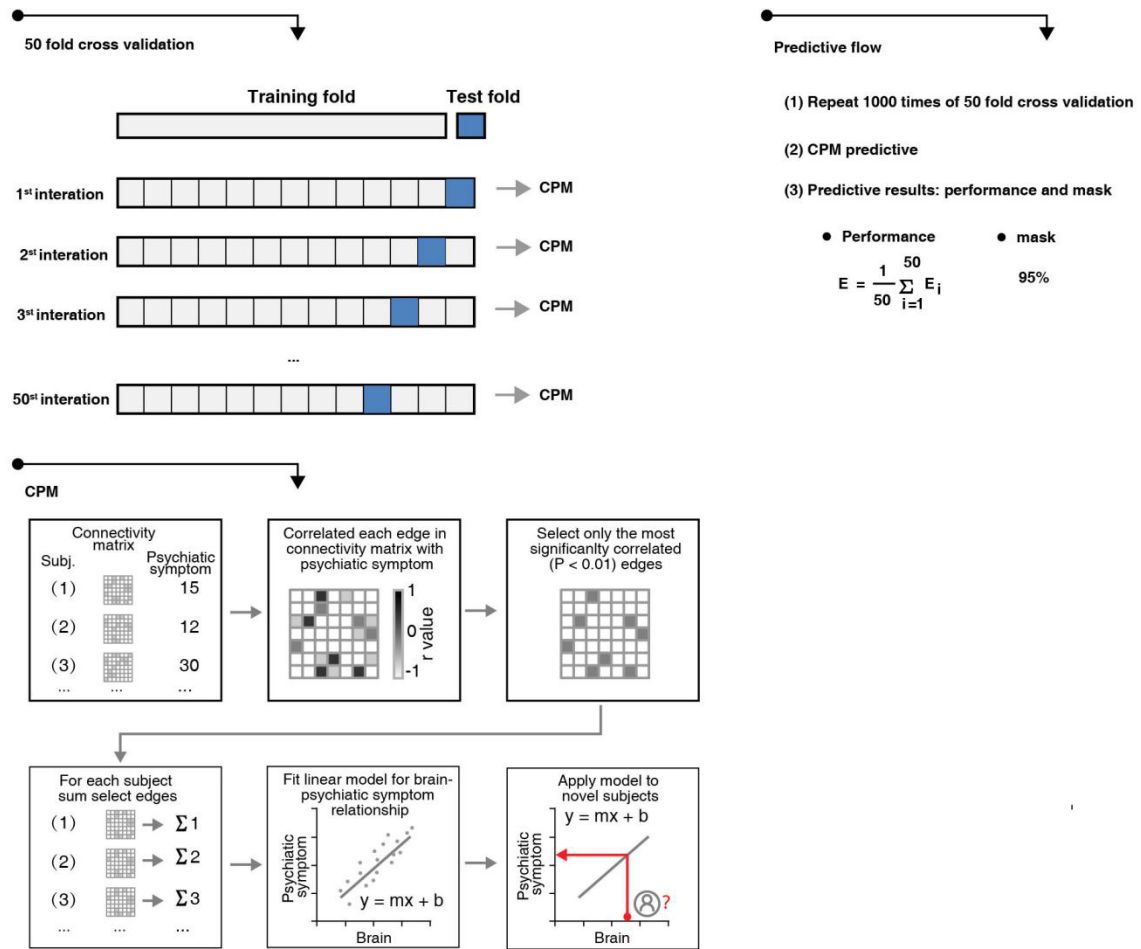

**Figure S4. The analysis flow of the connectome-based predictive model (CPM).**

# Linked Permutation analysis

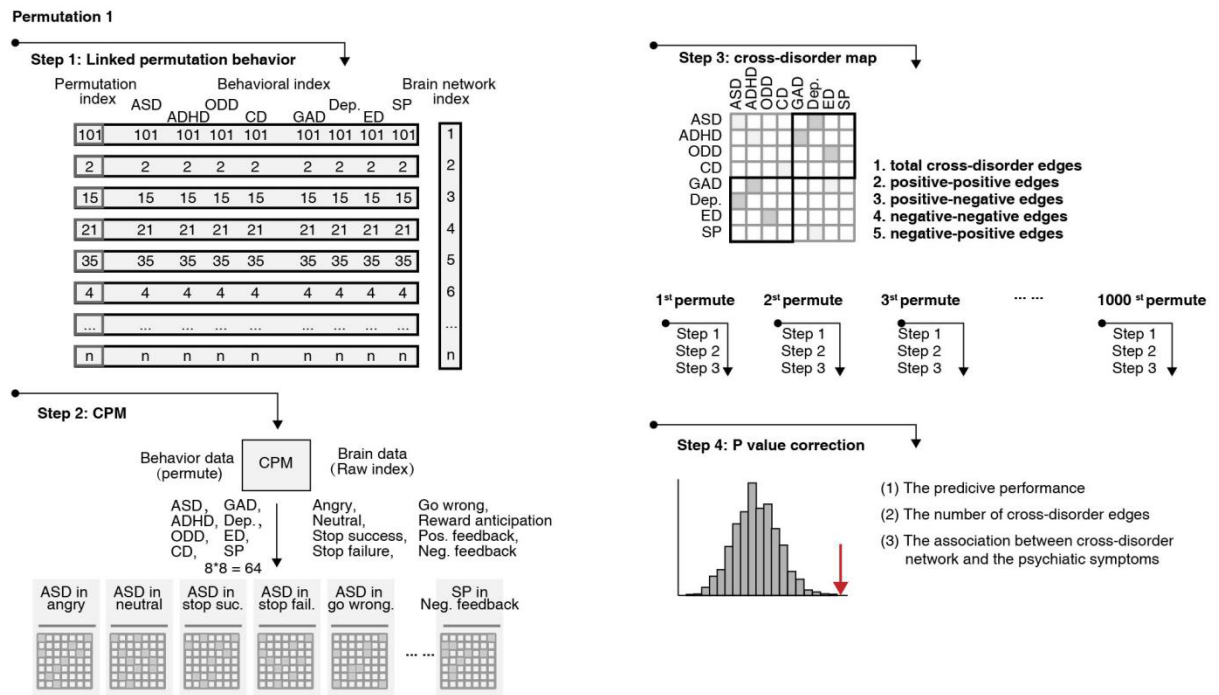

**Figure S5. The analysis flow of the permutation analysis.**

ADHD, attention deficit/hyperactivity disorder; ASD, autism spectrum disorder; CD, conduct disorder; ODD, oppositional defiant disorder; Pos. Feedback, positive feedback; Neg. Feedback, negative feedback.

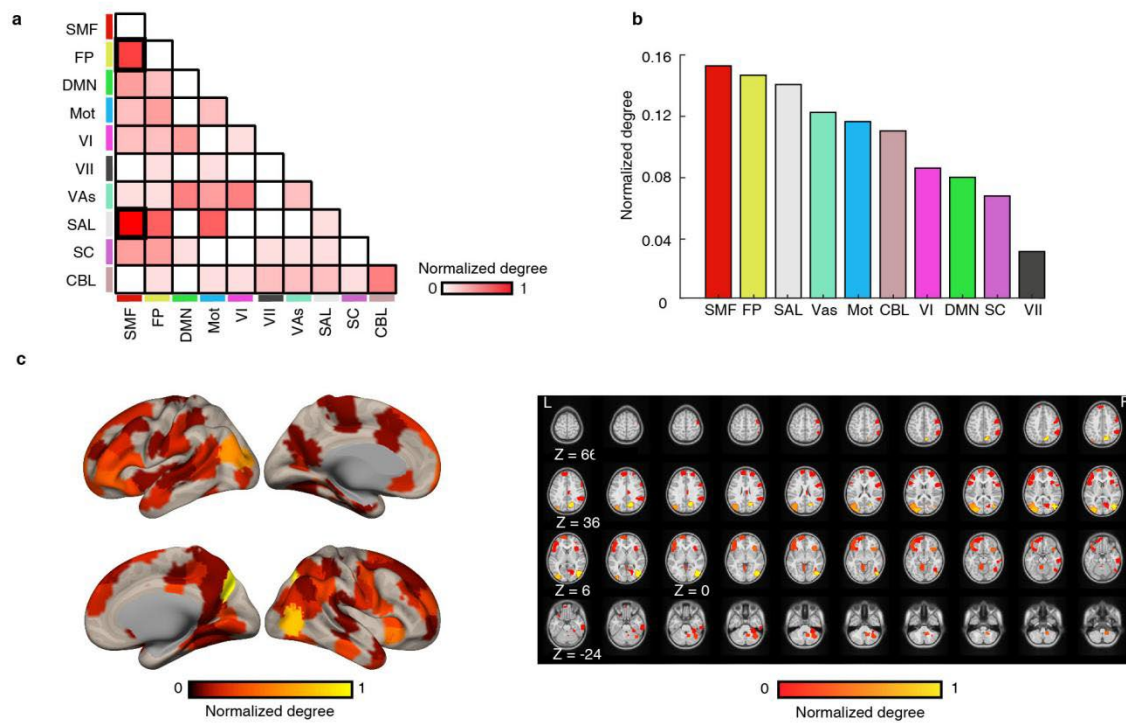

**Figure S6. The network-level and regional normalised degrees of the *NP* factor.** **a.** The normalised network degrees of the *NP* factor between and within the ten large-scale networks. **b.** The summed normalised network degrees of the *NP* factor for the ten large-scale networks. **c.** The normalised regional degrees of the *NP* factor.
